# Supplementary material
Source: Springer Nature journal article supplement (https://www.springermedizin.de/resource/supplementary/12936_2008_645_MOESM1_ESM.pdf/9547904)

**a.**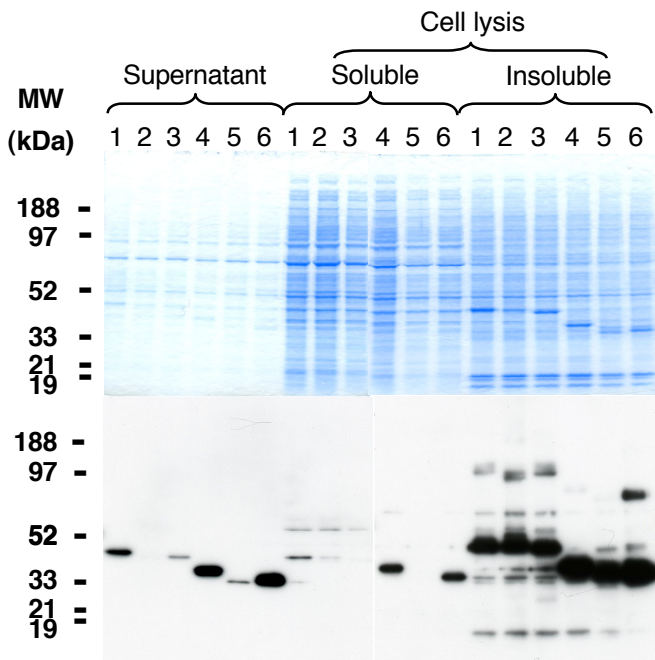**b.**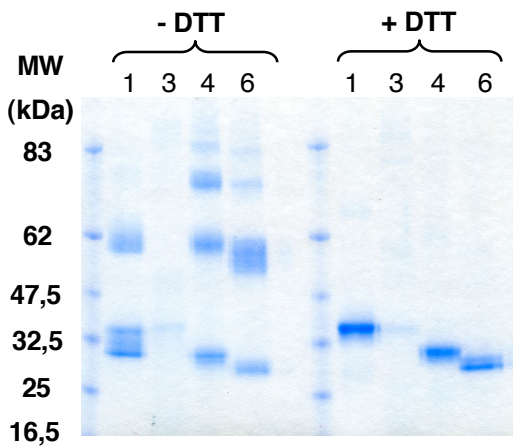

Supplement: MOESM1 [file 9547904]
